# Supplementary material for: Exploiting the Autozygome to Support Previously Published Mendelian Gene-Disease Associations: An Update
Source: Front Genet. 2020 Dec 31;11:580484. doi: 10.3389/fgene.2020.580484 (PMC7806527; doi:10.3389/fgene.2020.580484)
Supplement: Supplementary Table S1 — S. cerevisiae strains used in this study. [file Table_1.xlsx]

## Sheet: Table S1
Table S1. S. cerevisiae strains used in this study.
Strain name	Description	Genotype	Mating type	Source
YAD145	prototrophic haploid	prototroph in the FY strain background	MATa	Winston, et al.*
YAD146	prototrophic haploid	prototroph in the FY strain background	MATα	Winston, et al.*
YAD721	prototrophic diploid	prototroph in the FY strain background	MATa/MATα	Winston, et al.*
YAD722	prototrophic diploid	prototroph in the FY strain background	MATa/MATα	Winston, et al.*
YAD714	heterozygous for dut1 deletion	DUT1/dut1∆0::kanMX	MATa/MATα	This study
YAD715	heterozygous for dut1 deletion	DUT1/dut1∆0::kanMX	MATa/MATα	This study
YAD722	heterozygous for human DUT-N at the HO locus	ho∆519::yDUT:natNT2/HO DUT1/dut1∆0::kanMX	MATa/MATα	This study
YAD723	heterozygous for human DUT-N at the HO locus	ho∆519::yDUT:natNT2/HO DUT1/dut1∆0::kanMX	MATa/MATα	This study
YAD730	heterozygous for human DUT-N[R128Q] at the HO locus	ho∆519::yDUT(R128Q):natNT2/HO DUT1/dut1∆0::kanMX	MATa/MATα	This study
YAD731	heterozygous for human DUT-N[R128Q] at the HO locus	ho∆519::yDUT(R128Q):natNT2/HO DUT1/dut1∆0::kanMX	MATa/MATα	This study
YAD734	heterozygous for S.c. DUT1 at the HO locus	ho∆519::DUT1:natNT2/HO DUT1/dut1∆0::kanMX	MATa/MATα	This study
YAD735	heterozygous for S.c. DUT1 at the HO locus	ho∆519::DUT1:natNT2/HO DUT1/dut1∆0::kanMX	MATa/MATα	This study
YAD849	human DUT-N at the HO locus	ho∆519::yDUT:natNT2 dut1∆0::kanMX	MATα	This study
YAD850	human DUT-N at the HO locus	ho∆519::yDUT:natNT2 dut1∆0::kanMX	MATa	This study
YAD851	human DUT-N at the HO locus	ho∆519::yDUT:natNT2 dut1∆0::kanMX	MATα	This study
YAD852	human DUT-N at the HO locus	ho∆519::yDUT:natNT2 dut1∆0::kanMX	MATα	This study
YAD853	human DUT-N at the HO locus	ho∆519::yDUT:natNT2 dut1∆0::kanMX	MATa	This study
YAD854	human DUT-N at the HO locus	ho∆519::yDUT:natNT2 dut1∆0::kanMX	MATa	This study
YAD861	human DUT-N(R128Q) at the HO locus	ho∆519::yDUT(R128Q):natNT2 dut1∆0::kanMX	MATα	This study
YAD862	human DUT-N(R128Q) at the HO locus	ho∆519::yDUT(R128Q):natNT2 dut1∆0::kanMX	MATa	This study
YAD863	human DUT-N(R128Q) at the HO locus	ho∆519::yDUT(R128Q):natNT2 dut1∆0::kanMX	MATα	This study
YAD864	human DUT-N(R128Q) at the HO locus	ho∆519::yDUT(R128Q):natNT2 dut1∆0::kanMX	MATa	This study
YAD865	human DUT-N(R128Q) at the HO locus	ho∆519::yDUT(R128Q):natNT2 dut1∆0::kanMX	MATa	This study
YAD866	human DUT-N(R128Q) at the HO locus	ho∆519::yDUT(R128Q):natNT2 dut1∆0::kanMX	MATα	This study
YAD867	S.c. DUT1 at the HO locus	ho∆519::DUT1:natNT2 dut1∆0::kanMX	MATα	This study
YAD868	S.c. DUT1 at the HO locus	ho∆519::DUT1:natNT2 dut1∆0::kanMX	MATa	This study
YAD869	S.c. DUT1 at the HO locus	ho∆519::DUT1:natNT2 dut1∆0::kanMX	MATα	This study
YAD870	S.c. DUT1 at the HO locus	ho∆519::DUT1:natNT2 dut1∆0::kanMX	MATa	This study
YAD871	S.c. DUT1 at the HO locus	ho∆519::DUT1:natNT2 dut1∆0::kanMX	MATα	This study
YAD872	S.c. DUT1 at the HO locus	ho∆519::DUT1:natNT2 dut1∆0::kanMX	MATa	This study
*Winston, F., Dollard, C., and Ricupero-Hovasse, S.L. (1995). Construction of a set of convenient Saccharomyces cerevisiae strains that are isogenic to S288C. Yeast 11, 53-55.
